# Supplementary material for: Unexplained Early Infantile Epileptic Encephalopathy in Han Chinese Children: Next-Generation Sequencing and Phenotype Enriching
Source: PubMed Central journal article supplement (PMC5384237; doi:10.1038/srep46227), 2017-04-07
Supplement: srep46227-s1.pdf [file srep46227-s1.pdf]

# Unexplained Early Infantile Epileptic Encephalopathy in Han Chinese Children: Next-Generation Sequencing and Phenotype Enriching

Ahmed Arafat<sup>1</sup>, Peng Jing<sup>1</sup>, Yuping Ma<sup>1</sup>, Miao Pu<sup>1</sup>, Gai Nan<sup>1</sup>, He Fang<sup>1</sup>, Chen Chen<sup>1</sup>, Yin Fei<sup>1\*</sup>

1. Xiang Ya First Hospital of Central South University, China  
87 Xiang ya road, Changsha, Hunan, P.R. China, 410008  
Tel: 86-731-84327330  
Fax: 86-731-84327332  
E.mail: [csxyhpo@163.com](mailto:csxyhpo@163.com)

\*Corresponding Author

## Supplementary documents: Supporting Information

Table S1. A list of 308 candidate genes associated with Early Infantile Epileptic Encephalopathy (EIEE).

|                 |               |                |               |                |                 |                 |                |
|-----------------|---------------|----------------|---------------|----------------|-----------------|-----------------|----------------|
| <i>ABCC8</i>    | <i>KCNQ3</i>  | <i>DMPK</i>    | <i>PTPN22</i> | <i>C4A</i>     | <i>NDUFS6</i>   | <i>GABRG2</i>   | <i>SLC46A1</i> |
| <i>ACADSB</i>   | <i>KCTD7</i>  | <i>DNAJC5</i>  | <i>PUS1</i>   | <i>CACNA1H</i> | <i>NDUFV1</i>   | <i>GAMT</i>     | <i>SLC9A6</i>  |
| <i>ACTB</i>     | <i>KDM5C</i>  | <i>DNASE1</i>  | <i>QDPR</i>   | <i>CACNB4</i>  | <i>NDUFV2</i>   | <i>GBA</i>      | <i>SLC9A9</i>  |
| <i>ACY1</i>     | <i>KIF11</i>  | <i>DOCK6</i>   | <i>RAB39B</i> | <i>CACNG2</i>  | <i>NEU1</i>     | <i>GCK</i>      | <i>SNIP1</i>   |
| <i>ADK</i>      | <i>KIF1A</i>  | <i>DPYD</i>    | <i>RANBP2</i> | <i>CASR</i>    | <i>NF1</i>      | <i>GCSH</i>     | <i>SNRPN</i>   |
| <i>ADSL</i>     | <i>KRAS</i>   | <i>DRD2</i>    | <i>RELN</i>   | <i>CCM1</i>    | <i>NHLRC1</i>   | <i>GPHN</i>     | <i>SOBP</i>    |
| <i>AFG3L2</i>   | <i>L2HGDH</i> | <i>DRD3</i>    | <i>ROGDI</i>  | <i>CDKL5</i>   | <i>NHS</i>      | <i>GLB1</i>     | <i>SPAST</i>   |
| <i>AKT1</i>     | <i>LBR</i>    | <i>DTNBP1</i>  | <i>RPIA</i>   | <i>CEP152</i>  | <i>NOTCH3</i>   | <i>GLDC</i>     | <i>SPTAN1</i>  |
| <i>ALDH7A1</i>  | <i>LGII</i>   | <i>DXS423E</i> | <i>RTN4R</i>  | <i>CHI3L1</i>  | <i>NR3C1</i>    | <i>GLRA1</i>    | <i>SPTLC2</i>  |
| <i>ALG1</i>     | <i>LIAS</i>   | <i>EBP</i>     | <i>RYR1</i>   | <i>CHRNA2</i>  | <i>NRXN1</i>    | <i>GOSR2</i>    | <i>SRPX2</i>   |
| <i>ALG11</i>    | <i>LMX1B</i>  | <i>ECM1</i>    | <i>SCARB2</i> | <i>CHRNA3</i>  | <i>NTNG1</i>    | <i>GPR48</i>    | <i>STRADA</i>  |
| <i>ALG3</i>     | <i>MAG11</i>  | <i>EFHC1</i>   | <i>SCN1A</i>  | <i>CHRNA4</i>  | <i>NUBPL</i>    | <i>GPR98</i>    | <i>STS</i>     |
| <i>AMACR</i>    | <i>MAG12</i>  | <i>EHMT1</i>   | <i>SCN1B</i>  | <i>CHRNA5</i>  | <i>OFD1</i>     | <i>GRIN1</i>    | <i>STXBPI</i>  |
| <i>AMT</i>      | <i>MAN1B1</i> | <i>EIF2B1</i>  | <i>SCN2A</i>  | <i>CHRNA7</i>  | <i>OPHN1</i>    | <i>GRIN2A</i>   | <i>SUOX</i>    |
| <i>APOL2</i>    | <i>MANBA</i>  | <i>EIF2B2</i>  | <i>SCN8A</i>  | <i>CHRN2</i>   | <i>PAFAH1B1</i> | <i>GSS</i>      | <i>SYN1</i>    |
| <i>APOL4</i>    | <i>MAPK10</i> | <i>EIF2B3</i>  | <i>SCN9A</i>  | <i>CLCN2</i>   | <i>PAH</i>      | <i>GYS1</i>     | <i>SYN2</i>    |
| <i>APP</i>      | <i>MCCC2</i>  | <i>EIF2B4</i>  | <i>SCZD1</i>  | <i>CLN3</i>    | <i>PAK3</i>     | <i>HAX1</i>     | <i>SYNGAP1</i> |
| <i>ARG1</i>     | <i>MCPH1</i>  | <i>EIF2B5</i>  | <i>SCZD11</i> | <i>CLN5</i>    | <i>PANK2</i>    | <i>HFE</i>      | <i>SYP</i>     |
| <i>ARHGAP31</i> | <i>MECP2</i>  | <i>ELP4</i>    | <i>SCZD12</i> | <i>CLN6</i>    | <i>PCDH19</i>   | <i>HLA-DQA1</i> | <i>TBCID24</i> |
| <i>ARHGEF9</i>  | <i>MEF2C</i>  | <i>EMX2</i>    | <i>SCZD2</i>  | <i>CLN8</i>    | <i>PDHA1</i>    | <i>HLA-DQB1</i> | <i>TBP</i>     |
| <i>ARSA</i>     | <i>MFSD8</i>  | <i>EPB41L1</i> | <i>SCZD3</i>  | <i>CNTNAP2</i> | <i>PGK1</i>     | <i>HNF1B</i>    | <i>TCF4</i>    |
| <i>ARSE</i>     | <i>MLC1</i>   | <i>EPM2A</i>   | <i>SCZD5</i>  | <i>COG7</i>    | <i>PHF6</i>     | <i>HP</i>       | <i>TMEM165</i> |
| <i>ARX</i>      | <i>MOCS1</i>  | <i>ERBB4</i>   | <i>SCZD6</i>  | <i>COH1</i>    | <i>PHGDH</i>    | <i>HRAS</i>     | <i>TPP1</i>    |
| <i>ASAH1</i>    | <i>MOCS2</i>  | <i>ERLIN2</i>  | <i>SCZD7</i>  | <i>COMT</i>    | <i>PIGL</i>     | <i>HSD17B10</i> | <i>TREM2</i>   |

|                 |                |                      |                        |               |                     |                |                     |
|-----------------|----------------|----------------------|------------------------|---------------|---------------------|----------------|---------------------|
| <i>ATIC</i>     | <i>MOCS3</i>   | <i>EVC</i>           | <i>SCZD8</i>           | <i>COX6B1</i> | <i>PIGV</i>         | <i>HSD17B4</i> | <i>TREX1</i>        |
| <i>ATN1</i>     | <i>MR1</i>     | <i>FADD</i>          | <i>SERPINI1</i>        | <i>CPA6</i>   | <i>PLA2G6</i>       | <i>HTR2A</i>   | <i>TSC1</i>         |
| <i>ATPIA2</i>   | <i>MTHFR</i>   | <i>AMER1</i>         | <i>SETBP1</i>          | <i>CPS1</i>   | <b><i>PLCB1</i></b> | <i>HTT</i>     | <i>TSC2</i>         |
| <i>ATP2A2</i>   | <i>NDN</i>     | <i>FASTKD2</i>       | <i>SGCE</i>            | <i>CSTB</i>   | <i>PLP1</i>         | <i>ICCA</i>    | <i>TSEN2</i>        |
| <i>ATP6AP2</i>  | <i>NDUFA1</i>  | <i>FCGR2B</i>        | <i>SHH</i>             | <i>CTSA</i>   | <b><i>PNKP</i></b>  | <i>IDH2</i>    | <i>TSEN34</i>       |
| <i>ATRX</i>     | <i>NDUFA11</i> | <i>FKTN</i>          | <i>SIAT9</i>           | <i>CTSD</i>   | <i>PNPO</i>         | <i>IDS</i>     | <i>TSEN54</i>       |
| <i>ATXN10</i>   | <i>NDUFAF1</i> | <i>FLNA</i>          | <i>SIX3</i>            | <i>CYB5R3</i> | <i>POLG</i>         | <i>IER3IP1</i> | <i>TUBGCP6</i>      |
| <i>BANK1</i>    | <i>NDUFAF2</i> | <i>FOLR1</i>         | <i>SLC17A5</i>         | <i>D2HGDH</i> | <i>POMGNT1</i>      | <i>IFNG</i>    | <i>TYROBP</i>       |
| <i>BOLA3</i>    | <i>NDUFAF3</i> | <i>FOXG1</i>         | <i>SLC19A3</i>         | <i>DAO</i>    | <i>PPOX</i>         | <i>IL6</i>     | <i>UBE3A</i>        |
| <i>BRP44L</i>   | <i>NDUFAF4</i> | <i>FOXRED1</i>       | <i>SLC20A2</i>         | <i>DAOA</i>   | <i>PPT1</i>         | <i>INS</i>     | <i>XK</i>           |
| <i>C10orf2</i>  | <i>NDUFB3</i>  | <b><i>KCNQ2</i></b>  | <i>SLC25A15</i>        | <i>DBH</i>    | <i>PRICKLE1</i>     | <i>KCNA1</i>   | <i>ZDHHC15</i>      |
| <i>C12orf62</i> | <i>NDUFS1</i>  | <b><i>GABRA1</i></b> | <b><i>SLC25A22</i></b> | <i>DCX</i>    | <i>PRICKLE2</i>     | <i>KCNJ10</i>  | <i>ZEB2</i>         |
| <i>C20orf7</i>  | <i>NDUFS2</i>  | <i>GABRB3</i>        | <i>SLC26A4</i>         | <i>DHFR</i>   | <i>PROC</i>         | <i>KCNJ11</i>  | <i>ZFYVE26</i>      |
| <i>C2orf64</i>  | <i>NDUFS4</i>  | <i>GABRD</i>         | <i>SLC2A1</i>          | <i>DISC1</i>  | <i>PRODH</i>        | <i>KCNMA1</i>  | <i>ZNF41</i>        |
|                 |                |                      |                        | <i>DISC2</i>  | <i>PRRT2</i>        | <i>KCNQ1</i>   | <b><i>KCNT1</i></b> |

Table S1. A list of 308 candidate genes associated with (EIEE) *in bold are already known pathogenic genes.*
